# Supplementary material for: Enhancement of loop-mediated isothermal amplification (LAMP) with guanidine hydrochloride for the detection of Streptococcus equi subspecies equi (Strangles)
Source: PeerJ. 2024 Oct 8;12:e17955. doi: 10.7717/peerj.17955 (PMC11484460; doi:10.7717/peerj.17955)
Supplement: Supplemental Information 6 [file peerj-12-17955-s006.xlsx]

## Sheet: Positive control design
Synthetic positive control design
GenBank acc:	U73162
Name	5' position	3' position	Sequence (5'3')	Length (bp)
Str positive control	366	718	TTTAGCATCAGAAAACTAAGTGCCGGTGCAGCATCAGTATTAGTTGCAACAAGTGTGTTGGGAGGGACAACTGTAAAAGCGAACTCTGAGGTTAGTCGTACGGCGACTCCAAGATTATCGCGTGATTTAAAAAATAGATTAAGCGATATAGCCATAAGTGGAGATGCCTCATCAGCCCAAAAAGTTCGAAATCTTCTAAAAGGCGCCTCTGTTGGGGATTTACAGGCATTATTGAGAGGTCTTGATTCAGCAAGGGCTGCGTATGGTAGAGATGATTATTACAATTTATTGATGCACCTTTCATCGATGTTAAATGATAAACCTGATGGGGATAGAAGACAATTAAGTTTGGC	353

## Sheet: Primer set selection
Primer set selection
Primer set 1
Primer	5' pos	3' pos	Sequence (5'-3')	Length (bp)
F3	376	395	GAAAACTAAGTGCCGGTGCA	20
B3	604	623	AGCCCTTGCTGAATCAAGAC	20
FIP			TCTTGGAGTCGCCGTACGACTAAAGTGTGTTGGGAGGGACAA	42
F2	416	435	AAGTGTGTTGGGAGGGACAA	20
F1c	458	479	TCTTGGAGTCGCCGTACGACTA	22
BIP			AAGTGGAGATGCCTCATCAGCCGCCTGTAAATCCCCAACAGA	42
B2	573	592	GCCTGTAAATCCCCAACAGA	20
B1c	521	542	AAGTGGAGATGCCTCATCAGCC	22
Primer set 2
Primer	5' pos	3' pos	Sequence (5'-3')	Length (bp)
F3	447	466	AACTCTGAGGTTAGTCGTAC	20
B3	622	641	ATCATCTCTACCATACGCAG	20
FIP			GGCATCTCCACTTATGGCTATATCCGACTCCAAGATTATCGCG	43
F2	469	487	CGACTCCAAGATTATCGCG	19
F1c	510	533	GGCATCTCCACTTATGGCTATATC	24
BIP			TCATCAGCCCAAAAAGTTCGAAAGCTGAATCAAGACCTCTCAA	43
B2	597	616	GCTGAATCAAGACCTCTCAA	20
B1c	534	556	TCATCAGCCCAAAAAGTTCGAAA	23
LB	570	590	GCCTCTGTTGGGGATTTACAG	20
Primer set 3
Primer	5' pos	3' pos	Sequence (5'-3')	Length (bp)
F3	508	528	GCGATATAGCCATAAGTGGAG	21		Primer set	Tp (mm:ss) (1 ng/µl)	Tp (mm:ss) 0.1 ng/µl)
B3	688	708	ATTGTCTTCTATCCCCATCAG	21		Set 1	09:58:00	07:39:00
FIP			TGCCTGTAAATCCCCAACAGAGGGCCTCATCAGCCCAAAAAGTTC	45		Set 2	03:49:00	04:07:00
F2	532	552	GCCTCATCAGCCCAAAAAGTTC	22		Set 3	NO TIME RECORDED	13:49:00
F1c	571	593	TGCCTGTAAATCCCCAACAGAGG	23
BIP			AGAGGTCTTGATTCAGCAAGGGCACATCGATGAAAGGTGCATCA	44
B2	655	675	ACATCGATGAAAGGTGCATCA	21
B1c	600	622	AGAGGTCTTGATTCAGCAAGGGC	23

## Sheet: Primer opt
Primer optimisation: Concentration
Primer	Concentration (µM)				Primer combination	Average Tp (mm:ss)	STDEV	STDEV (mm:ss)	Intra-CV (%)
	Concentration 1	Concentration 2	Concentration 3		Combination 1	03:55:06.667000	0.00861394	00:12:24.245000	0.00140641
F3/B3	0.2	0.2	0.2		Combination 2	06:17:20	0.00530391	00:07:38.258000	0.00138982
FIP/BIP	0.8	1.6	0.8		Combination 3	03:15:40	0.00882427	00:12:42.417000	0.00119904
Loop B	0.4	2	1
RT-LAMP results 1					RT-LAMP results 2					RT-LAMP results 3
Concentration	Tp (mm:ss) 1	Tp (mm:ss) 2	Tp (mm:ss) 3		Concentration	Tp (mm:ss) 1	Tp (mm:ss) 2	Tp (mm:ss) 3		Concentration	Tp (mm:ss) 1	Tp (mm:ss) 2	Tp (mm:ss) 3
1	03:53:00	03:53:00	03:51:00		1	04:01:00	04:09:00	04:00:00		1	03:58:00	04:05:00	03:26:00
2	06:09:00	06:24:00	06:19:00		3	03:21:00	03:33:00	03:26:00		3	03:03:00	03:04:00	03:07:00
Concentration 3 LOD
DNA concentration	Tp 1a	Tp 1b	Tp 1c	Mean
1 ng/µl	00:04:54	00:05:06	00:05:07	00:05:02.333000
1x10-1 ng/µl	00:06:29	00:06:20	00:06:26	00:06:25
1x10-2 ng/µl	00:08:29	00:08:59	00:09:00	00:08:49.333000
1x10-3 ng/µl	00:10:40	00:10:23	00:10:52	00:10:38.333000
1x10-4 ng/µl	00:12:21	00:13:35	00:11:43	00:12:33
1x10-5 ng/µl	00:13:15	00:13:24	00:12:38	00:13:05.667000
1x10-6 ng/µl	00:14:31	No amplification	No amplificaiton
1x10-7 ng/µl	No amplification	No amplification	No amplificaiton
1x10-8 ng/µl	No amplification	No amplification	No amplificaiton
1x10-9 ng/µl	No amplification	No amplification	No amplificaiton

## Sheet: GuHCl opt
Guanidine hydrochloride (GuHCl) optimisation
Initial concentration screen
GuHCl concentration	Tp (mm:ss)
0 mM	07:18:00
5 mM	08:18:00
10 mM	06:49:00
20 mM	06:15:00
30 mM	06:21:00
40 mM	08:54:00
50 mM	10:06:00
60 mM	07:53:00
GuHCl concentration LOD challenge
	Tp (mm:ss)
Sample concentration (ng/µl)	0 mM GuHCl	10 mM GuHCl	20 mM GuHCl	30 mM GuHCl
1x10-7	12:47:00	10:06:00	09:46:00	10:37:00
1x10-8	15:32:00	12:40:00	11:30:00	14:18:00
1x10-9	25:58	14:08:00	12:43:00	12:05:00

## Sheet: LOD + CV- no GuHCl
LOD + CV - No GuHCl
						CV Inter
							Mean tp	STD	STD (Time)	CV inter
						1 ng/µl	05:36:00	0.000674344	00:58:00	0.00939815
						1x10-1 ng/µl	06:52:00	0.000765147	01:06:00	0.0131134
						1x10-2 ng/µl	08:15:00	0.000669326	00:58:00	0.0138455
						1x10-3 ng/µl	10:16:00	0.00184703	02:40:00	0.0475309		0.222222
						1x10-4 ng/µl	11:11:00	0.000165716	00:14:00	0.00453029		1
						1x10-5 ng/µl	11:49:00	0.000650644	00:56:00	0.0191474
						1x10-6 ng/µl	12:44:00	0.000498089	00:43:00	0.015843		0.777778
						1x10-7 ng/µl	19:02:00	0.00338143	04:52:00	0.160814
						1x10-8 ng/µl	21:52:00	0.00229951	03:19:00	0.12591
Assay 1						Assay 2						Assay 2
	Tp 1a	Tp 1b	Tp 1c	Mean			Tp 2a	Tp 2b	Tp 2c	Mean			Tp 3a	Tp 3b	Tp 3c	Mean
1 ng/µl	00:04:18	00:04:22	00:04:23	00:04:21		1 ng/µl	00:05:53	00:05:53	00:06:02	00:05:56		1 ng/µl	00:06:33	00:06:25	00:06:34	00:06:30.667000
1x10-1 ng/µl	00:05:23	00:05:32	00:05:34	00:05:29.667000		1x10-1 ng/µl	00:07:08	00:07:08	00:07:02	00:07:06		1x10-1 ng/µl	00:07:53	00:08:04	00:08:03	00:08:00
1x10-2 ng/µl	00:06:53	00:06:47	00:07:42	00:07:07.333000		1x10-2 ng/µl	00:08:23	00:08:19	00:08:20	00:08:20.667000		1x10-2 ng/µl	00:09:20	00:09:17	00:09:10	00:09:15.667000
1x10-3 ng/µl	00:08:22	00:17:06	00:08:49	00:11:25.667000		1x10-3 ng/µl	00:09:36	00:09:45	00:09:47	00:09:42.667000		1x10-3 ng/µl	00:10:50	00:09:04	00:09:03	00:09:39
1x10-4 ng/µl	00:11:07	00:11:25	00:11:35	00:11:22.333000		1x10-4 ng/µl	00:11:05	00:11:09	00:11:21	00:11:11.667000		1x10-4 ng/µl	00:10:47	00:11:00	00:11:07	00:10:58
1x10-5 ng/µl	00:12:53	00:12:44	00:12:31	00:12:42.667000		1x10-5 ng/µl	00:10:50	00:10:34	00:10:30	00:10:38		1x10-5 ng/µl	00:12:05	00:12:02	00:12:14	00:12:07
1x10-6 ng/µl	00:12:43	00:12:44	00:12:31	00:12:39.333000		1x10-6 ng/µl	00:11:58	00:12:03	00:11:54	00:11:58.333000		1x10-6 ng/µl	00:13:12	00:13:45	00:13:46	00:13:34.333000
1x10-7 ng/µl	00:16:50	00:15:04	00:15:02	00:15:38.667000		1x10-7 ng/µl	00:17:54	00:20:24	00:28:14	00:22:10.667000		1x10-7 ng/µl	00:16:06	00:15:50	00:25:51	00:19:15.667000
1x10-8 ng/µl	00:19:25	00:17:56		00:18:40.500000		1x10-8 ng/µl	00:21:31			00:21:31		1x10-8 ng/µl	00:22:09	00:27:35	00:22:33	00:24:05.667000

## Sheet: LOD + CV- 20 mM GuHCl
LOD + CV - 20 mM GuHCl
						CV Inter
							Mean tp	STD	STD (Time)	CV inter
						1 ng/µl	02:50:00	0.000657411	00:57:00	0.00467303
						1x10-1 ng/µl	03:48:00	0.000224686	00:19:00	0.00208912
						1x10-2 ng/µl	04:44:00	0.000417059	00:36:00	0.00493056
						1x10-3 ng/µl	06:17:00	0.000435145	00:38:00	0.00690876
						1x10-4 ng/µl	07:36:00	0.000513791	00:44:00	0.00967593
						1x10-5 ng/µl	08:17:00	7.67252e-05	00:07:00	0.00167776
						1x10-6 ng/µl	09:35:00	0.000137313	00:12:00	0.00332755
						1x10-7 ng/µl	10:58:00	0.000361313	00:31:00	0.009837
						1x10-8 ng/µl	13:19:00	0.00118258	01:42:00	0.0393027
						1x10-9 ng/µl	INC	INC	INC	INC
Assay 1						Assay 2						Assay 2
	Tp 1a	Tp 1b	Tp 1c	Mean			Tp 2a	Tp 2b	Tp 2c	Mean			Tp 3a	Tp 3b	Tp 3c	Mean
1 ng/µl	00:02:20	00:02:25	00:02:20	00:02:21.667000		1 ng/µl	00:02:24	00:02:24	00:02:39	00:02:29		1 ng/µl	00:02:51	00:05:18	00:02:53	00:03:40.667000
1x10-1 ng/µl	00:03:22	00:03:32	00:03:35	00:03:29.667000		1x10-1 ng/µl	00:04:22	00:03:33	00:03:46	00:03:53.667000		1x10-1 ng/µl	00:04:06	00:03:54	00:04:01	00:04:00.333000
1x10-2 ng/µl	00:03:50	00:03:48	00:05:03	00:04:13.667000		1x10-2 ng/µl	00:04:43	00:04:34	00:04:37	00:04:38		1x10-2 ng/µl	00:05:22	00:05:18	00:05:19	00:05:19.667000
1x10-3 ng/µl	00:06:23	00:06:24	00:06:22	00:06:23		1x10-3 ng/µl	00:05:31	00:06:05	00:05:08	00:05:34.667000		1x10-3 ng/µl	00:07:05	00:06:45	00:06:50	00:06:53.333000
1x10-4 ng/µl	00:07:38	00:07:50	00:07:51	00:07:46.333000		1x10-4 ng/µl	00:06:49	00:06:52	00:06:24	00:06:41.667000		1x10-4 ng/µl	00:08:31	00:08:21	00:08:07	00:08:19.667000
1x10-5 ng/µl	00:08:13	00:08:14	00:08:08	00:08:11.667000		1x10-5 ng/µl	00:08:13	00:08:17	00:08:17	00:08:15.667000		1x10-5 ng/µl	00:08:22	00:08:20	00:08:31	00:08:24.333000
1x10-6 ng/µl	00:09:21	00:09:16	00:09:24	00:09:20.333000		1x10-6 ng/µl	00:09:41	00:09:48	00:09:46	00:09:45		1x10-6 ng/µl	00:09:36	00:09:34	00:09:46	00:09:38.667000
1x10-7 ng/µl	00:10:22	00:10:35	00:10:33	00:10:30		1x10-7 ng/µl	00:11:57	00:11:30	00:11:15	00:11:34		1x10-7 ng/µl	00:11:06	00:10:51	00:10:37	00:10:51.333000
1x10-8 ng/µl	00:12:00	00:12:05	00:12:12	00:12:05.667000		1x10-8 ng/µl	00:16:04	00:16:09	00:12:44	00:14:59		1x10-8 ng/µl	00:14:00	00:12:44	00:11:55	00:12:53
1x10-9 ng/µl	00:13:29	00:16:22	00:14:32	00:14:47.667000		1x10-9 ng/µl		00:14:33	00:23:48	00:19:10.500000		1x10-9 ng/µl	00:13:22		00:14:00	00:13:41

## Sheet: LOD comparison
Comparison of 0 mM GuHCl and 20 mM GuHCl LOD
	No GuHCl			20 mM GuHCl			Comparison
DNA concentration (ng/µl) [copy no/µl]	Average Tp (mm:ss)	Average STD (mm:ss)	Inter-CV (%)	Average Tp (mm:ss)	Average STD (mm:ss)	Inter-CV (%)	Tp difference (mm:ss)	Tp difference (%)	Inter-CV difference (%)
1 ng/µl (5.3x10⁹)	00:05:36	00:00:58	0.0094	00:02:50	00:00:57	0.0047	-02:46	0.505952	-0.0047
1x10⁻¹ ng/µl (5.3x10⁸)	00:06:52	00:01:06	0.0131	00:03:48	00:00:19	0.0021	-03:04	0.553398	-0.011
1x10⁻² ng/µl (5.3x10⁷)	00:08:15	00:00:58	0.0138	00:04:44	00:00:36	0.0049	-03:31	0.573737	-0.0089
1x10⁻³ ng/µl (5.3x10⁶)	00:10:16	00:02:40	0.0475	00:06:17	00:00:38	0.0069	-03:59	0.612013	-0.0406
1x10⁻⁴ ng/µl (5.3x105)	00:11:11	00:00:14	0.0045	00:07:36	00:00:44	0.0097	-03:35	0.679583	0.0052
1x10⁻⁵ ng/µl (5.3x10⁴)	00:11:49	00:00:56	0.0191	00:08:17	00:00:07	0.0017	-03:32	0.700987	-0.0174
1x10⁻⁶ ng/µl (5.3x10³)	00:12:44	00:00:43	0.0158	00:09:35	00:00:12	0.0033	-03:09	0.752618	-0.0125
1x10⁻⁷ ng/µl (5.3x10²)	00:19:02	00:04:52	0.1608	00:10:58	00:00:31	0.0098	-08:04	0.576182	-0.151
1x10⁻⁸ ng/µl (53)	00:21:52	00:03:19	0.1259	00:13:19	00:01:42	0.0393	-08:33	0.608994	-0.0866
Average decrease			0.0455444			0.00915556	-04:30	0.618163	-0.0363889
							00:04:30		0.608994	0.576182

## Sheet: Clinical isolates PCR 
Streptococcus equi subspecies equi clinical isolates PCR confirmation
Expected product size: 195

## Sheet: Clinical isolates LAMP
Clinical isolates LAMP results
							Correct identification	0.907692		Clinical specificity	0.888889		Clinical sensitivity	0.912621
SE = Streptococcus equi subspecies equi							Total correct identification	118		Total SZ correct identification	24		Total correct identification	94
SZ = Streptococcus equi subspecies zooepidemicus							Total number of samples	130		Total SZ samples	27		Total number of samples	103
NA = No amplification							Total number of isolates	58		Total SZ isolates	11		Total number of isolates	47
Assay 1													Average Tp (mm:ss)	00:13:20.160000
Sample ID	Tp 1 (mm:ss)	Total correct ID	Total samples
SE1A	00:13:44	10	12
SE1B	00:13:34
SE1C	00:13:53
SE2A	00:14:25												0.912621
SE2B	00:26:07											0.907692
SE2C	00:22:14
SZ1A	NA
SZ1B	NA
SZ1C	NA
SZ2A	NA
SZ2B	NA
SZ2C	00:24:34
Assay 2
Sample ID	Tp 1 (mm:ss)	Total correct ID	Total samples
SE3A	00:10:17	9	9
SE3B	00:10:19
SE3C	00:10:17
SE4A	00:11:11
SE4B	00:11:43
SE4C	00:11:31
SE5A	00:11:03
SE5B	00:11:27
SE5C	00:11:08
+ve con 1	00:02:34
+ve con 2	00:02:37
Assay 3
Sample ID	Tp 1 (mm:ss)	Total correct ID	Total samples
SE6A	00:14:25	13	13
SE6B	00:16:11
SE7A	00:13:30
SE7B	00:14:09
SE8A	00:13:27
SE8B	00:12:51
SE9A	00:13:36
SE9B	00:12:52
SE10A	00:09:51
SE10B	00:09:47
SZ3A	NA
SZ3B	NA
SZ3C	NA
+ve con 1	00:03:37
+ve con 2	00:03:54
Assay 4
Sample ID	Tp 1 (mm:ss)	Total correct ID	Total samples
SE11A	00:10:04	10	12
SE11B	00:10:03
SE11C	00:09:23
SZ4A	00:17:33
SZ4B	NA
SZ4C	NA
SE12A	00:09:07
SE12B	00:09:07
SE12C	00:09:31
SZ5A	00:19:35
SZ5B	NA
SZ5C	NA
+ve con 1	00:03:49
+ve con 2	00:03:38
Assay 5
Sample ID	Tp 1 (mm:ss)	Total correct ID	Total samples
SE13A	00:14:35	11	14
SE13B	00:14:24
SE14A	00:14:40
SE14B	NA
SE15A	00:14:15
SE15B	00:13:39
SE16A	00:14:52
SE16B	00:15:24
SE17A	00:11:46
SE17B	NA
SE18A	00:13:56
SE18B	00:14:36
SZ6A	00:16:25
SZ6B	NA
+ve con	00:03:24
Assay 6
Sample ID	Tp 1 (mm:ss)	Total correct ID	Total samples
SE19A	NA	12	14
SE19B	00:28:54
SE20A	00:12:49
SE20B	00:13:40
SE21A	00:14:26
SE21B	00:15:07
SE22A	00:18:45
SE22B	00:19:27
SE23A	00:15:12
SE23B	00:18:55
SE24A	00:13:01
SE24B	00:12:05
SZ7A	NA
SZ7B	NA
+ve con	00:02:40
Assay 7
Sample ID	Tp 1 (mm:ss)	Total correct ID	Total samples
SE25A	00:11:07	14	14
SE25B	00:11:13
SE26A	00:13:26
SE26B	00:12:33
SE27A	00:11:51
SE27B	00:11:49
SE28A	00:11:36
SE28B	00:12:02
SE29A	00:13:03
SE29B	00:12:48
SE30A	00:11:51
SE30B	00:11:38
SZ8A	NA
SZ8B	NA
+ve con	00:02:36
Assay 8
Sample ID	Tp 1 (mm:ss)	Total correct ID	Total samples
SE31A	00:13:50	13	14
SE31B	00:13:45
SE32A	00:16:14
SE32B	00:14:49
SE33A	00:13:22
SE33B	00:12:18
SE34A	00:21:03
SE34B	00:14:43
SE35A	00:15:22
SE35B	00:16:06
SE36A	00:13:29
SE36B	00:18:39
SZ9A	NA
SZ9B	NA
+ve con	00:02:53
Assay 9
Sample ID	Tp 1 (mm:ss)	Total correct ID	Total samples
SE37A	00:11:22	13	14
SE37B	00:11:22
SE38A	00:14:19
SE38B	00:14:22
SE39A	00:13:21
SE39B	00:13:23
SE40A	00:20:03
SE40B	00:18:30
SE41A	00:19:04
SE41B	00:15:51
SE42A	00:14:17
SE42B	00:13:23
SZ10A	00:25:14
SZ10B	00:21:40
+ve con	00:02:53
Assay 10
Sample ID	Tp 1 (mm:ss)	Total correct ID	Total samples
SE42A	00:11:24	13	14
SE42B	00:11:34
SE43A	00:13:20
SE43B	00:13:26
SE44A	00:13:26
SE44B	00:13:31
SE45A	00:13:24
SE45B	00:13:16
SE46A	00:19:30
SE46B	00:23:24
SE47A	00:13:06
SE47B	00:12:50
SZ11A	NA
SZ11B	NA
+ve con	00:02:35
